# Supplementary material
Source: publisher figshare collection journal article supplement (https://acs.figshare.com/ndownloader/files/4256740)
Supplement: Supplementary file 1 [file 4256740]

## Supporting Information

# Carbon capture and mineralization in Singapore: preliminary environmental impacts and costs via LCA

*Hsien H. Khoo<sup>1\*</sup>, Paul N. Sharratt<sup>1</sup>, Jie. Bu<sup>1</sup>, Tze Y. Yeo<sup>1</sup>, Armando Borgna<sup>1</sup>, James G. Highfield<sup>1</sup>,  
Thomas. G. Bjorklof<sup>2</sup>, Ron Zevenhoven<sup>2</sup>*

<sup>1</sup>Institute of Chemical and Engineering Sciences, 1 Pesek Road, Jurong Island, 627833 Singapore

<sup>2</sup>Thermal and Flow Engineering Laboratory, Abo Akademi University, Piispankatu 8, 20500 Turku, Finland

\*CORRESPONDING AUTHOR: [khoo\\_hsien\\_hui@ices.a-star.edu.sg](mailto:khoo_hsien_hui@ices.a-star.edu.sg); fax: +65 – 6267-8835.

### Life cycle inventory data

The air emissions from the NGCC power plant are taken from Tan et. al.<sup>1</sup>. Supplementary data are extracted from Jeramillo et. al.<sup>2</sup>. The CO<sub>2</sub> recovery process considered is amine scrubbing utilizing monoethanolamine. The energy penalty for an NGCC power plant is 16% with CO<sub>2</sub> recovery rates of 90%<sup>3</sup>. Heat energy demands for amine scrubbing of CO<sub>2</sub> from power plant flue gas can be as high as 3570 MJ/tonne CO<sub>2</sub><sup>4</sup>. The amine scrubbing process technology details can be found in McKee<sup>5</sup>.

The adoption of the carbon capture technology will affect the amount of NO<sub>x</sub> emissions per MWh from the NGCC power plant flue gas. This is because the energy penalty imposed on the power plant requires additional combustion of natural gas for every MWh delivered to the user. However, SO<sub>x</sub> emissions

(which will be very small for natural gas firing) are expected to be reduced as the sulfur compounds may react with the amine solvent. As for PM emissions, it was reported that there are hardly any changes in the emission levels with and without any post combustion capture installed<sup>6, 7</sup>.

The total energy required for mineral mining activities, including crushing and packaging, is estimated to be 62.3 MJ/tonne mineral<sup>8,9</sup>. The amount of CO<sub>2</sub> emissions emitted due to energy use for mining minerals in Western Australia is estimated from CARMA<sup>10</sup>, which is 0.176 kg CO<sub>2</sub> per MJ. Other emissions (NO<sub>x</sub>, SO<sub>x</sub>, PM) are taken from EcoInvent<sup>11</sup>. The inventory data is compiled in **Table 1a**.

Freight shipment emissions and energy needed (0.095 MJ/tonne-km) are estimated with the use of GaBi life cycle engineering<sup>12</sup>. They are shown in **Table 1b**. The distance from Western Australia to Singapore is 3986 kilometers (from port to port by sea).

### **EDIP 2003: Normalization**

All environmental impact methods are carried out according to EDIP 2003<sup>13</sup>. The normalized values for both global warming and energy use are taken from EIA<sup>14, 15</sup>. The values for acidification and human toxicity to air (due to dust emissions) are from the EDIP. They are compiled in **Table 1c**.

### **REFERENCES**

- (1) Tan, R.B.H.; Wijaya, D.; Khoo, H.H. LCI analysis of fuels and electricity generation in Singapore, *Energy* **2010**, 35, 4910 – 4916.
- (2) Jaramillo, P.; Griffin, W.M.; Matthews, H.S. Comparative Life-Cycle Air Emissions of Coal, Domestic Natural Gas, LNG, and SNG for Electricity Generation. *Environ. Sci. Technol.* **2007**, 41, 6290-6296.

- (3) IPCC special report on carbon dioxide capture and storage. Intergovernmental Panel on Climate Change 2005, Working Group III, United Nations Environmental Protection.
- (4) Romeo, L.M.; Bolea, I.; Escosa, J.M. Integration of power plant and amine scrubbing to reduce CO<sub>2</sub> capture costs. *App. Thermal Engr.* **2008**, 28, 1039-1046.
- (5) McKee, B. *Solutions for the 21<sup>st</sup> Century: Zero Emissions Technology for Fossil Fuels*. Technology Status Report, International Energy Agency, Committee on Energy Research and Technology, Working Paper on Fossil Fuels, OECD/IEA, France, **2002**.
- (6) Tzimas, E.; Mercier, A.; Cormos, C.C.; Peteves, S.D. Trade-off in emissions of acid gas pollutants and of carbon dioxide in fossil fuel power plants with carbon capture, *Energy Policy* **2007**, 35, 3991-3998.
- (7) Koornneef, J.; Ramirez, A.; van Harmelen, T.; van Horssen, A.; Turkenburg, W.; Faaij, A. The impact of CO<sub>2</sub> capture in the power and heat sector on the emission of SO<sub>2</sub>, NO<sub>x</sub>, particulate matter, volatile organic compounds and NH<sub>3</sub> in the European Union. *Atmos. Env.* **2010**, 44, 1369-1385.
- (8) Hangx, S.J.T.; Spiers, C.J., Coastal spreading of olivine to control atmospheric CO<sub>2</sub> concentrations: a critical analysis of viability. *Int. J. GHGC.* **2009**, 3, 757-767.
- (9) NREL (National Renewable Energy Laboratory). U.S Life-cycle inventory database: Limestone mining. 2009.
- (10) CARMA (Carbon Monitoring for Action). *Western Australia*. Center for Global Development. 2007.
- (11) EcoInvent. Unit Processes: Limestone mining, crushing and packaging. 2009.
- (12) Gabi life cycle engineering. Database: transportation: ocean freight. PE International; 2009.
- (13) Hauschild M, Potting J. *Spatial differentiation in life cycle impact assessment — the EDIP 2003*

*methodology*. Institute for Product Development, Technical University of Denmark, 2003.

(14) EIA (Energy Information Administration). *Singapore's Carbon Dioxide Emissions Per Capita and Carbon Intensity*, 2009.

(15) EIA (Energy Information Administration). *Overview of the Energy Situation in Singapore*, 2009.

**Table 1a.** Compiled list of air emissions

| kg pollutants per MWh from NGCC power<br>plant w/o capture (with capture) |                 | kg pollutants /kg mineral mined<br>(unless described otherwise) |                         |
|---------------------------------------------------------------------------|-----------------|-----------------------------------------------------------------|-------------------------|
| CO <sub>2</sub>                                                           | 380 (126)       | CO <sub>2</sub>                                                 | 0.176 kg/MJ             |
| NO <sub>x</sub>                                                           | 0.65 (0.76)     | NO <sub>x</sub>                                                 | 1.16 x 10 <sup>-6</sup> |
| SO <sub>x</sub>                                                           | 0.054 (0.011)   | SO <sub>x</sub>                                                 | 1.77 x 10 <sup>-7</sup> |
| PM                                                                        | 0.0055 (0.0055) | PM                                                              | 0.000112                |

**Table 1b.** Pollution from shipment

| kg pollutants per 1 tonne-km |                         |
|------------------------------|-------------------------|
| CO <sub>2</sub>              | 0.00675                 |
| NO <sub>x</sub>              | 9.49x10 <sup>-5</sup>   |
| SO <sub>x</sub>              | 1.61 x 10 <sup>-4</sup> |
| PM                           | 5.45 x 10 <sup>-6</sup> |

**Table 1c.** Normalized values

| Environmental impacts                          | Normalized values                                            |
|------------------------------------------------|--------------------------------------------------------------|
| Global warming (total kg CO <sub>2</sub> )     | 8700 kg CO <sub>2</sub> /capita                              |
| Energy (MJ total)                              | 502416 MJ/capita                                             |
| Acidification (m <sup>2</sup> /UES)            | 2200 m <sup>2</sup> /UES/capita (EDIP 2003)                  |
| Human Toxicity to Air (m <sup>3</sup> /kg air) | 4.87 x 10 <sup>7</sup> m <sup>3</sup> /kg/capita (EDIP 2003) |
